# Supplementary material for: Red-emitting Cs2NaScCl6:Sm flexible films for high-resolution X-ray imaging
Source: Royal Society of Chemistry journal article supplement (doi:10.1039/d4ce00018h), 2024-01-01
Supplement: d4ce00018h1.pdf [file d4ce00018h1.pdf]

## Supporting Information

# Red-Emitting $\text{Cs}_2\text{NaScCl}_6\text{:Sm}$ Flexible Films for High-Resolution X-Ray Imaging

*Yuxia Li<sup>a,c</sup>, Qi Luo<sup>a,c</sup>, Xin Huang<sup>b,c</sup>, Hao Lu<sup>c,d</sup>, Yazhou Yuan<sup>a,c</sup>, Xieming Xu<sup>b,c</sup>,  
Shuaihua Wang<sup>\*b,c</sup>, and Shaofan Wu<sup>\*b,c</sup>*

<sup>a</sup>College of Chemistry and Materials Science, Fujian Normal University, Fuzhou, 350117, China

<sup>b</sup>Fujian Science & Technology Innovation, Laboratory for Optoelectronic Information of China, Fuzhou, 350108, P. R. China

<sup>c</sup>Key Laboratory of Optoelectronic Materials Chemistry and Physics, Fujian Institute of Research on the Structure of Matter, Chinese Academy of Sciences, Fuzhou, 350002, P. R. China.

<sup>d</sup>University of Chinese Academy of Sciences, Beijing, 100049, P. R. China

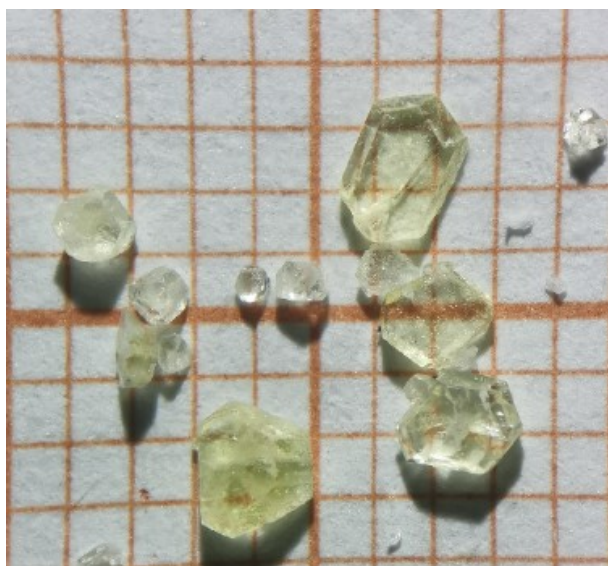

**Figure S1.** Physical diagram of Cs<sub>2</sub>NaScCl<sub>6</sub>.

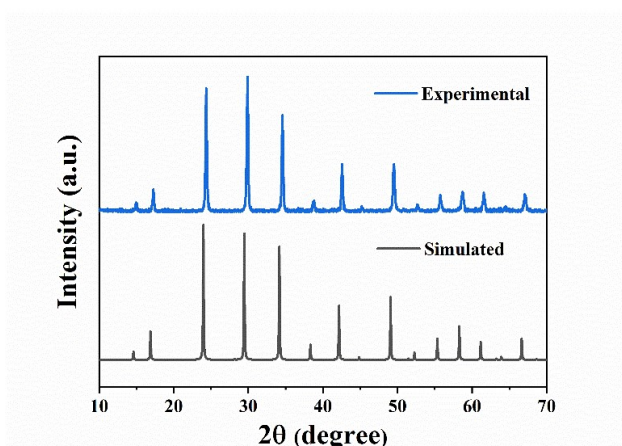

**Figure S2.** PXRD of Cs<sub>2</sub>NaScCl<sub>6</sub> compared to the simulated pattern based on SCXRD measurements. It shows that the synthesized material is pure phase, and verifies the accuracy of single crystal data.

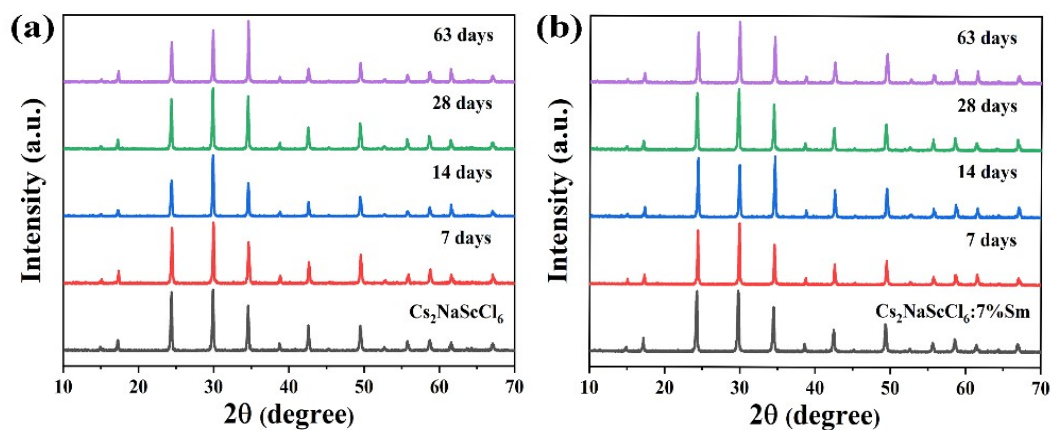

**Figure S3.** PXRD patterns of Cs<sub>2</sub>NaScCl<sub>6</sub> and Cs<sub>2</sub>NaScCl<sub>6</sub>:7%Sm crystal powder

exposed to ambient air.

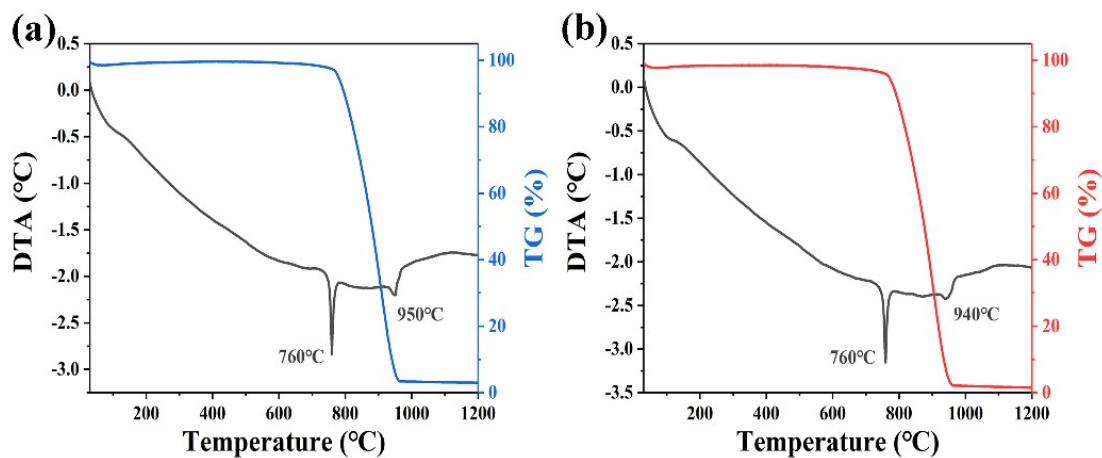

**Figure S4.** TG and DTA curves of  $\text{Cs}_2\text{NaScCl}_6$  (left),  $\text{Cs}_2\text{NaScCl}_6:7\%\text{Sm}$  (right).

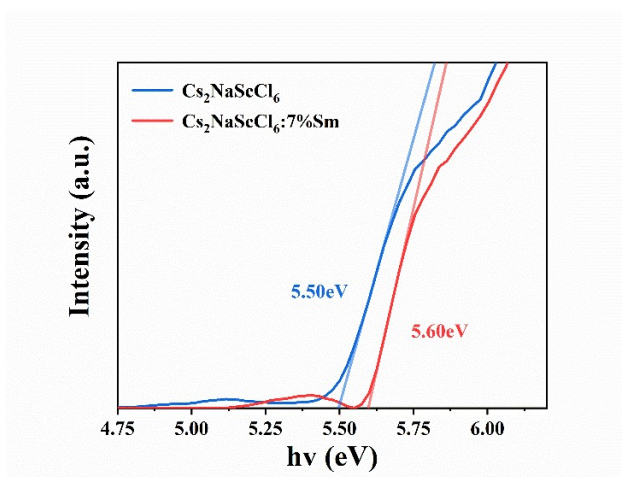

**Figure S5.** The band gap fitting diagram of  $\text{Cs}_2\text{NaScCl}_6$  and  $\text{Cs}_2\text{NaScCl}_6:7\%\text{Sm}$ .

Attenuation efficiency  $T$  is defined as:

$$T = 1 - e^{-\mu_L x}$$

In this equation,  $\mu_L$  is the linear attenuation coefficient which can be obtained by  $\rho\mu_m$ ,  $x$  is the effective retarding thickness,  $\rho$  is the density of materials and  $\mu_m$  is the mass attenuation coefficient. The value of  $\mu_m$  was easily obtained from the photon cross sections database XCOM.

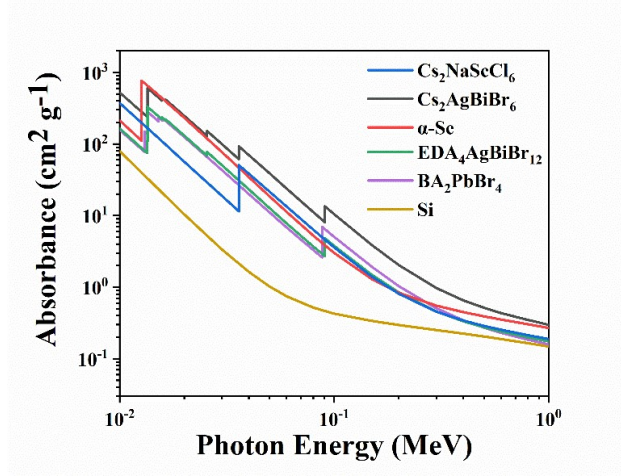

**Figure S6.** X-ray absorption coefficient spectra of  $\text{Cs}_2\text{NaScCl}_6$  and other scintillating materials.

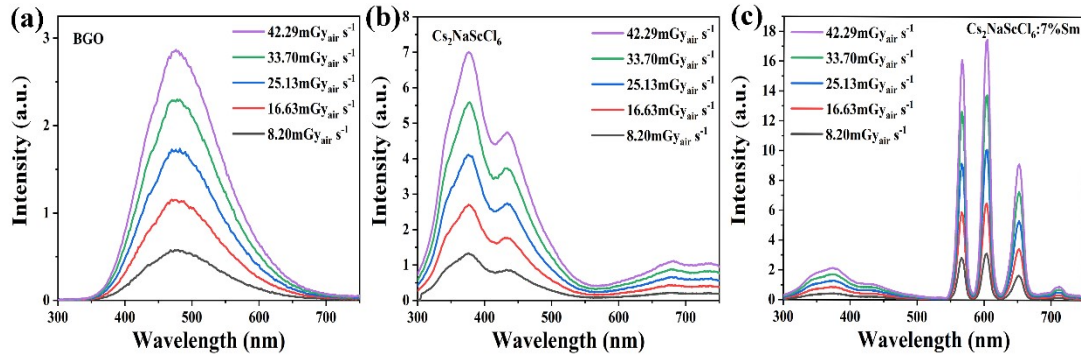

**Figure S7.** XEL diagram of BGO,  $\text{Cs}_2\text{NaScCl}_6$ , and  $\text{Cs}_2\text{NaScCl}_6:7\%\text{Sm}$  at 50kV with different tube currents.

The light yield of  $\text{Cs}_2\text{NaScCl}_6:7\%\text{Sm}$  was calculated with BGO's optical yield of 100.0% as the standard. We measured the response amplitude ( $R$ ) of the BGO and  $\text{Cs}_2\text{NaScCl}_6:7\%\text{Sm}$  using photo-multiplier tubes (PMT R928). LY is obtained from the following equation:

$$\frac{LY_{sample}}{LY_{BGO}} = \frac{R_{sample}}{R_{BGO}} \times \frac{\int I_{BGO} S(\lambda) d\lambda / \int I_{BGO} d\lambda}{\int I_{sample} S(\lambda) d\lambda / \int I_{sample} d\lambda}$$

where  $I(\lambda)$  is the XEL spectrum and  $S(\lambda)$  in Figure S8 is the detection efficiency of the PMT.

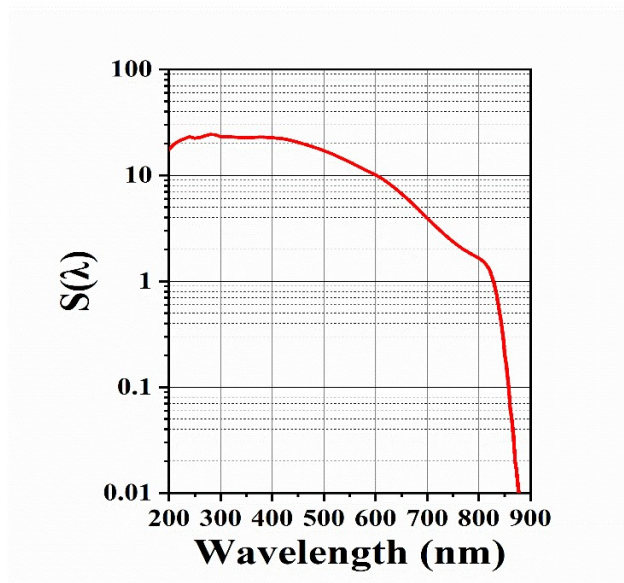

**Figure S8.** The detection efficiency of PMT.

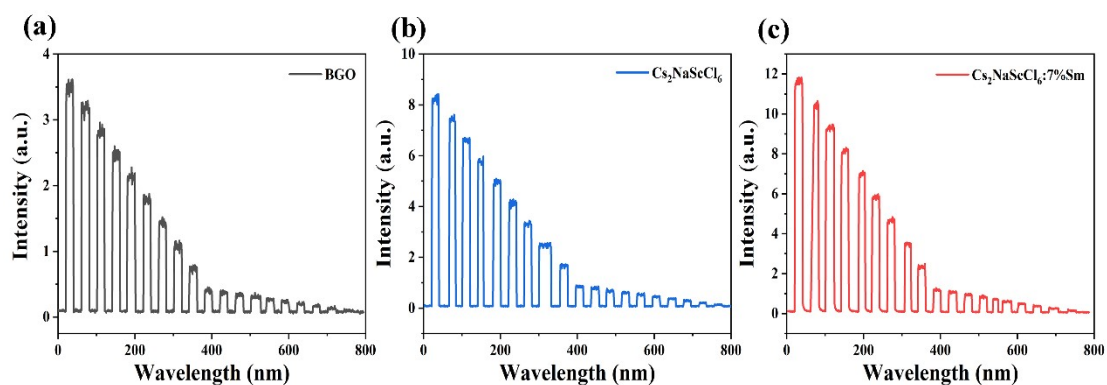

**Figure S9.** Detection limit test diagram of BGO,  $\text{Cs}_2\text{NaScCl}_6$ , and  $\text{Cs}_2\text{NaScCl}_6:7\%\text{Sm}$  at different tube currents at 50 kV.

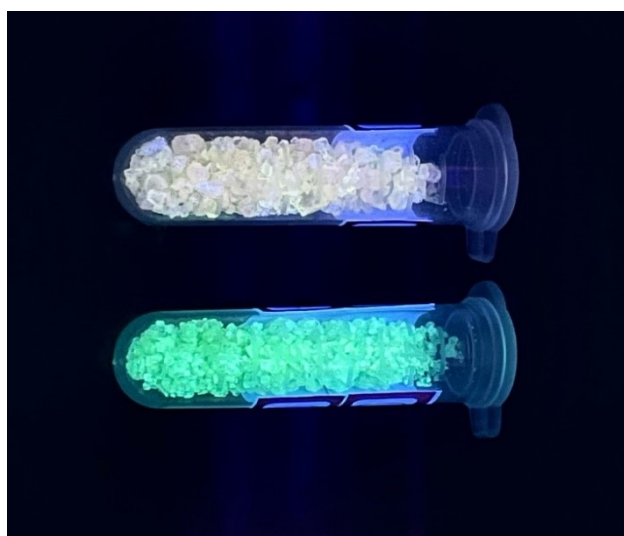

**Figure S10.** Physical images of  $\text{Cs}_2\text{NaScCl}_6:7\%\text{Sm}$  and  $\text{Cs}_2\text{NaScCl}_6:10\%\text{Tb}$  under 254

nm lamp irradiation in a UV dark box.

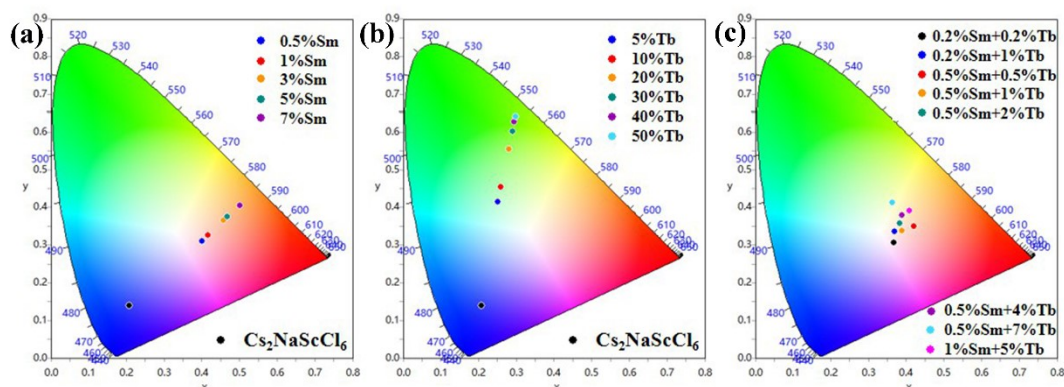

**Figure S11.** CIE chromaticity diagrams corresponding to X-ray luminescence for  $\text{Cs}_2\text{NaScCl}_6$ ,  $\text{Cs}_2\text{NaScCl}_6:\text{xSm}$ ,  $\text{Cs}_2\text{NaScCl}_6:\text{yTb}$ , and  $\text{Cs}_2\text{NaScCl}_6:\text{xSm,yTb}$  sample powders.

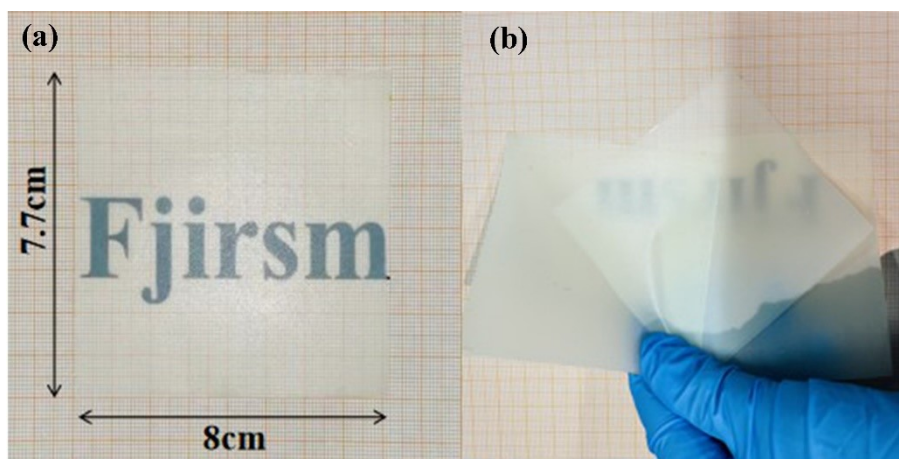

**Figure S12.** Photographs of  $\text{Cs}_2\text{NaScCl}_6:7\%\text{Sm}$  and other flexible scintillation films.

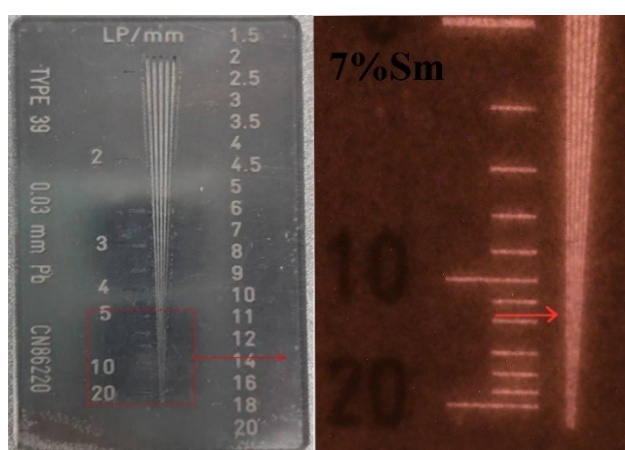

**Figure S13.** Physical and X-imaging of wire-pair card by  $\text{Cs}_2\text{NaScCl}_6:7\%\text{Sm}$  scintillating film under  $8.154 \text{ mGyair s}^{-1}$  X-ray irradiation.

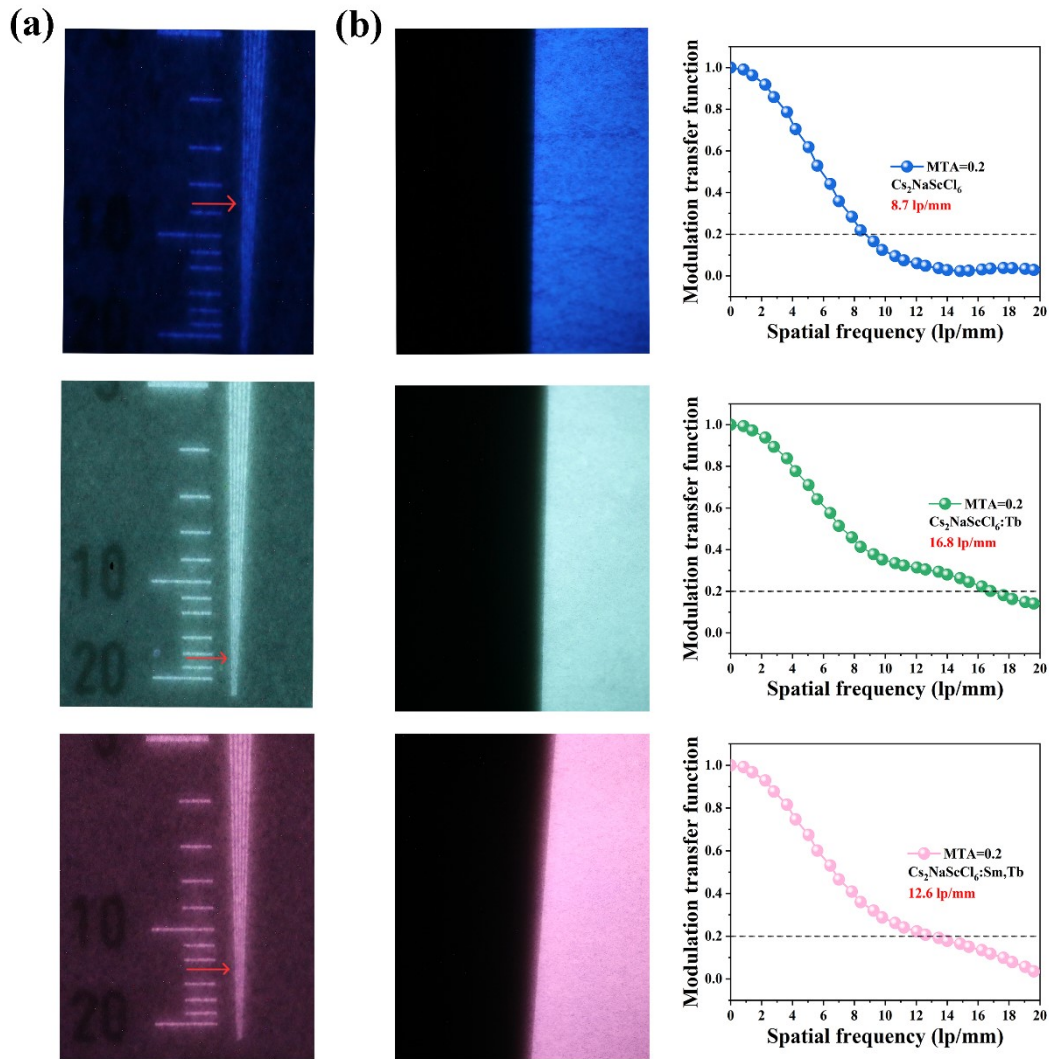

**Figure S14.** X-ray imaging of  $\text{Cs}_2\text{NaScCl}_6$ ,  $\text{Cs}_2\text{NaScCl}_6:10\%\text{Tb}$  and  $\text{Cs}_2\text{NaScCl}_6:0.2\%\text{Sm},1\%\text{Tb}$  scintillation film pairs of 20 line pairs of standard line pairs and corresponding MTF curves.
